1 **Computer vision and deep learning automates nocturnal rainforest ant tracking to provide insight**  
2 **into behavior and disease risk**

3  
4 Natalie Imirzian<sup>1\*</sup>, Yizhe Zhang<sup>2</sup>, Christoph Kurze<sup>1,3</sup>, Raquel G. Loreto<sup>1,4</sup>, Danny Z. Chen<sup>2</sup>, & David P.  
5 Hughes<sup>1,3\*</sup>

6 <sup>1</sup>Department of Entomology, Pennsylvania State University, University Park, PA, USA

7 <sup>2</sup>Department of Computer Science & Engineering, University of Notre Dame, Notre Dame, IN, USA

8 <sup>3</sup>Department of Biology, Pennsylvania State University, University Park, PA, USA

9 <sup>4</sup>Department of Entomology, Federal University of Viçosa, Viçosa, Minas Gerais, Brazil

10 \*Corresponding authors: [nsi2@psu.edu](mailto:nsi2@psu.edu); [dph14@psu.edu](mailto:dph14@psu.edu)

11

12 **Abstract**

13 Determining how ant colonies optimize foraging while mitigating disease risk provides insight into how  
14 the ants have achieved ecological success. Fungal infected cadavers surround the main foraging trails of  
15 the carpenter ant *Camponotus rufipes*, offering a system to study how foragers behave given the persistent  
16 occurrence of disease threats. Studies on social insect foraging behavior typically require many hours of  
17 human labor due to the high density of individuals. To overcome this, we developed deep learning based  
18 computer vision algorithms to track foraging ants, frame-by-frame, from video footage. We found  
19 foragers can be divided into behavioral categories based on how straight they walk across the trail. Eighty  
20 percent of ants walk directly across the trail, while 20% wander or circle when crossing the trail.

21 Departure from the main trail encourages exploration of new areas and could enhance discovery of new  
22 food resources. Conversely, results from our agent-based model simulations suggest deviation from a  
23 straight path exposes foragers to more infectious fungal spores. Consistency in walking behavior may  
24 protect most ants from infection, while the foragers with increased exposure due to their mode of walking  
25 could be a sufficient number of new hosts to sustain disease in this environment.

26

## 27 **Introduction**

28 Resource acquisition drives animals into new territories, while threat avoidance limits where animals  
29 move. A consistent threat is the presence of infectious propagules of parasites and these are hypothesized  
30 to be major determinants of the distribution of animals in the wild<sup>1</sup>. Examples of animals avoiding  
31 pathogen contaminated areas span diverse taxa, from mammals to insects, implying anti-parasite behavior  
32 is widespread<sup>1-5</sup>. Central place foragers are interesting in the context of parasite avoidance as they must  
33 obtain food while avoiding threats with the additional constraint of returning to a defined location after  
34 each trip. For volant central place foragers, like wasps, bees, bats and birds, much of the trip is through  
35 the air likely reducing contact with infectious material. However, for taxa which walk on the ground (e.g.  
36 ants), encounters with parasite propagules are presumably higher<sup>6</sup>. To effectively study such pressure, it is  
37 crucial to use systems where we can study foragers in nature, surrounded by their naturally occurring  
38 pathogens.

39 The foraging strategies of ants range from workers searching and retrieving food entirely  
40 independently to obligately in a group<sup>7</sup>. Chemical trails commonly facilitate group foraging, and in some  
41 cases, these chemical trails develop into semi-permanent trails known as ‘trunk trails’<sup>8</sup>. Trunk trails  
42 stimulate research interest largely from the perspective of the self-organization behavior of ants, such as  
43 how ants regulate traffic<sup>9-11</sup>. Trunk trails have also been studied from the perspective of their temporal  
44 and spatial dynamics as well as their energetic value in terms of efforts expended and resources  
45 obtained<sup>12,13</sup>. Yet, studies have not investigated how utilizing the same trails day after day impacts the  
46 exposure of ants to parasitism. Moreover, studies on ant foraging have largely occurred in a laboratory  
47 setting, and of the work that took place in the field, most studies relied on human observation or  
48 manipulated the environment in some way (see references in Supplementary Table S1). An ant species  
49 that forages collectively and predictably in time and space would be useful to assess the relationship  
50 between trail behavior and disease risk.

51 A potential system is the carpenter ant *Camponotus rufipes* in southeastern Brazil, which forms  
52 trunk trails lasting for multiple months<sup>14,15</sup>. Colonies of this ant were recorded as having a chronic

53 infection by the fungal parasite *Ophiocordyceps camponoti-rufipedes* across 20 months<sup>16,17</sup>. This fungus  
54 manipulates foragers to leave the nest and die biting the underside of a leaf<sup>17,18</sup>. To complete its lifecycle,  
55 the fungus must grow out of the ant cadaver and form a fruiting body that releases spores onto the ground  
56 below that will infect other ants<sup>18</sup>. Cadavers are found attached to leaves surrounding the ant nest<sup>17</sup>. The  
57 chronic nature of infection at the colony level means the spores of the pathogen are continuously in the  
58 environment from the perspective of the foragers. The spores are curved and large (80-95 microns<sup>16</sup>)  
59 implying they do not travel far and land on the nearby trails once released from ant cadavers that hang  
60 above trails. Spores germinate to produce infectious secondary spores on hairs (capilliconidia) which  
61 attach to ants as they walk over them<sup>19</sup>. Thus, infection does not require a spore to hit an ant as it walks on  
62 a trail below a cadaver. Instead, the trail substrate itself serves as the source of contamination.

63 Foragers of the carpenter ant *C. rufipes* mostly collect nectar from hemipteran secretions and  
64 extrafloral sources<sup>14,20</sup>. The exploitation of a stable resource suggests that all foragers will emerge to walk  
65 directly to the food source, utilizing trails near the colony entrance as a highway<sup>15</sup>. Evidence from other  
66 systems demonstrate trunk trails as well organized for traffic flow<sup>10</sup>. Traffic is bi-directional on the trunk  
67 trails of *C. rufipes*. Thus, we expect an even mixture of inbound and outbound ants as this is hypothesized  
68 to increase flow<sup>21</sup>. If colonies can regulate the number of foragers on the trail to create a steady flow, we  
69 expect forager speed to remain approximately constant throughout the foraging period as foragers are not  
70 limited by the density of ants on the trail. Lastly, we are interested to see how the individual walking  
71 behavior observed influences the likelihood of an ant encountering an infectious spore.

72 We set out to study trails of seven *C. rufipes* colonies in their undisturbed rainforest habitat with  
73 both food sources and pathogens occurring at natural levels. We devised a system of recording trails using  
74 infrared lights and modified cameras to contend with the nocturnal foraging of this species. To overcome  
75 observer bias and ensure a larger body of data from which patterns may emerge, we used machine  
76 learning to automate ant tracking. This provided us with a powerful dataset from which the movement  
77 pattern of ants throughout a foraging period can be examined. We then characterized the forager  
78 trajectories on speed, straightness, and direction. Based on these measurements, we were able to classify

79 ants on the trail into behavioral groups. Using an agent-based model based on our data, we suggest a  
80 mechanism for the maintenance of disease in this system.

81

## 82 **Methods**

### 83 *Study site*

84 Fieldwork took place at the Research Station of Mata do Paraíso, Universidade Federal de Viçosa, Minas  
85 Gerais, Southeast Brazil (20°48'08 S 42°52'31 W) between 10 and 25 January 2017. The carpenter ant  
86 *Camponotus rufipes* is abundant in this area, forming trails lasting multiple months<sup>14,15</sup>. Trails of *C.*  
87 *rufipes* are typically found on 'bridges' composed of woody debris, lianas and tree branches and are  
88 rarely directly on the forest floor<sup>15</sup>. Ants forage at night and activity peaks in the early evening<sup>15</sup>.

89

### 90 *Trail filming*

91 Trails from seven different *C. rufipes* nests were filmed between 10 and 25 January 2017. Nests were  
92 selected based on their location and structure. Only nests found above the ground with nest material  
93 clearly visible were used. Trails were filmed before a branching point from the main trail so that ants  
94 were filmed coming directly from or towards the nest. In the case where multiple trails came from one  
95 nest, the busiest trails were selected. The width of the branches filmed ranged from 0.8 cm to 7 cm (mean  
96  $\pm$  standard deviation; 2.97 cm  $\pm$  2.53) and the length of the area filmed for all branches was  
97 approximately 15 cm.

98 GoPro cameras (model: HERO 3+, GoPro, Inc., San Mateo, USA) with a modified infrared filter

99 (RageCams.com, Michigan, USA) were used for filming. Stakes were placed 30 centimeters from the

100 trails and 30 cm medium trigger clamps (DWHT83140, DeWalt, Towson, USA) were attached to the

101 stakes. Cameras were attached to clamps so that cameras were approximately 30 centimeters above the

102 trails looking down at the ants walking on the trails (Supplementary Fig. S1). An additional camera was

103 placed on the stake, looking sideways at the ants, to allow another perspective for behavioral analysis.

104 Filming lasted from 19:30 to 00:00 for 4-7 nights for each trail (Supplementary Table S2). Timing of

105 filming was based on previous work showing activity begins around 19:30 and peaks around 21:00<sup>15</sup>.  
106 Infrared lights (IR30, CMVision, Houston, USA) were connected 12-Volt 7Ah batteries (UP1270,  
107 UniPower, São Paulo, Brazil) to allow illumination of the trail without disturbing the behavior of the ants.  
108 The camera batteries lasted for approximately 1.5 hours, so the battery was changed once in the middle of  
109 a filming period. Slight adjustments in where the trail was positioned in the video view would sometimes  
110 occur at this time. Figure 1a shows an example image of a trail filmed and images of the remaining trails  
111 filmed are found in Supplementary Figure S2.

112

### 113 *Automated ant tracking*

114 A total of 78 hours and 56 minutes of video were recorded for seven colonies across four nights  
115 (Supplementary Table S2). We developed a machine learning approach to process and analyze these  
116 videos using a deep learning based segmentation model that identified ants as they came onto the screen  
117 and tracked them as they moved across the screen.

118 Our automatic ant tracking method contains two main processes: (1) detecting ants in each image  
119 frame of all videos, and (2) building ant trajectories for every video based on the detected ants.  
120 Commonly, deep learning schemes require a large amount of labeled ground truth data for model training.  
121 Since our dataset is quite large (> 8 million image frames), we aimed to generate sufficient labeled data  
122 for training our deep learning model without incurring excessive human labeling effort. Also due to the  
123 large size of our dataset, common active learning based sample selection methods (e.g.<sup>22</sup>) are not efficient.  
124 The goal of ant detection is to build ant movement trajectories and since ant trajectories normally span  
125 multiple consecutive frames in videos, detected ant positions in earlier frames assist with ant detection in  
126 later consecutive frames. That is, while ant detection forms a basis for building ant trajectories,  
127 trajectories of detected ants may also help ant detection. Hence, we designed our trajectory building  
128 procedure such that it not only can track detected ants but also can provide cues to indicate where (which  
129 frames and locations) there might be inconsistencies in ant trajectories and difficult scenarios for ant  
130 detection (e.g. densely clustered ants). We used such cues to select difficult cases from the frames for

131 labeling to improve the deep learning detection model as well as the ant detection results. Therefore, our  
132 detection-tracking method consists of two rounds (with the second round improving the detection and  
133 tracking results of the first round), and each round performs two major steps, ant detection and trajectory  
134 building, as described below.

135

136 (1) Ant detection. This aims to detect ants in all the frames of the videos. We applied a novel object  
137 detection and segmentation model, Mask R-CNN<sup>23</sup>, to automatically detect ants in every frame.

138

139 (2) Ant trajectory building. Given the detected ants in each frame, the next step is to form ant trajectories  
140 that connect detected ants frame-by-frame in videos. We formulated this ant trajectory building problem  
141 as a *transportation problem*, that is, between every two consecutive frames in each video, we find an  
142 optimal transportation (for ants) that corresponds to real movement of ants. In this transportation  
143 formulation, each detected ant in frame  $K$  can be viewed as a ‘supplier’ and each detected ant in frame  
144  $K+I$  can be viewed as a ‘receiver’. The dissimilarity (based on spatial distance and appearance  
145 difference) between ants in two consecutive frames is a measure of how much ‘cost’ it would take to  
146 transport (move) one ant in frame  $K$  to another in frame  $K+I$ . The objective is to transport detected ants  
147 (as many as possible) in frame  $K$  to frame  $K+I$  with the minimum total cost. Optimal transportation based  
148 tracking methods are known to be effective for tracking sets of moving and changing objects in image  
149 sequences<sup>24,25</sup>.

150

151 In the first round, we randomly selected frames to label as training data. This allowed us to quickly and  
152 unbiasedly obtain data samples for training a decent detection model. We then applied the trained model  
153 to all of the frames to produce ant detection results. Next, we conducted trajectory building on detected  
154 ants to form the ant trajectories. Besides tracking ant movement, our trajectory building procedure in the  
155 first round also provided cues for identifying inconsistencies in ant trajectories and difficult cases in the  
156 frames for ant detection. In the second round, we applied training data selection to those difficult cases to

157 find additional frames for labeling, and the enlarged training dataset thus obtained was used to re-train the  
158 Mask R-CNN detection model. The re-trained detection model was then applied to all the frames to  
159 produce the final ant detection results, which were used to build the final ant trajectories in the videos.

160 To identify difficult cases for additional training data selection, we used the following set of  
161 measures to capture possible errors in ant detection and trajectory results. (i) Ant speed: At a place where  
162 ants usually do not move very fast but a fast movement is suggested by the optimal transportation  
163 solution, this instance might indicate an error in ant detection. (ii) Missing ants in the middle part of a tree  
164 branch: When the optimal transportation solution does not find a corresponding ant instance in the next  
165 frame in the interior section of a tree branch, it might suggest a missing data point in ant detection. (iii)  
166 Ant identification (ID) switching: Each detected ant was assigned an ID number; when multiple ants are  
167 seen at spatially close interaction and slight changes on the dissimilarity scores among these ants give  
168 largely different solutions for the optimal transportation problem, this might suggest an ant ID switch  
169 error. Based on these observations and measures, our trajectory building process can help identify  
170 difficult detection and tracking cases for additional training data selection to improve model performance.

171 Overall, our automatic ant detection and tracking method extracted the  $x$  and  $y$  coordinates in  
172 pixels of detected ants in every frame and assigned each ant an identification number (Fig. 1a;  
173 Supplementary Video S1). Ant identification numbers were used to form ant trajectories used in further  
174 analysis.

175

#### 176 *Error assessment*

177 To assess the accuracy of the computer model, we watched a subset of videos and determined the error  
178 rate. GoPro cameras automatically divide footage into 26-minute-long videos, so one night of footage at a  
179 single trail has 6 to 10 videos. This provides a way of checking the accuracy of the computer tracking at  
180 random points throughout a night. We first error checked videos from the middle of the night (when the  
181 trails should be busiest) to determine if the data from that colony was high enough quality to use in our  
182 analysis. If the error rate was sufficiently low, we continued to error check all videos and nights for that

183 colony. To error check, we counted the number of ant trajectories with errors out of the first 15-30 tracked  
184 ants. The number of ant trajectories checked varied because videos from early in the foraging period  
185 sometimes had fewer ants.

186 To ensure consistency in the type of ant trajectories that were analyzed, trajectories beginning in  
187 the middle of the field of video view were removed. This created uniformity between all colonies and  
188 nights in the type of ants that were compared as it focused on the ants that made it from one end of the  
189 trail to the other completely in the view of the video.

190

### 191 *Trajectory analysis*

192 We used R version 3.4.4 and RStudio version 1.1.447 for all analyses<sup>26,27</sup>. Ant location data was frame-  
193 by-frame, so we used the native frame rate of the cameras (29.97 or 25 frames per second; the default  
194 setting of the cameras varied) to convert the time in frames to seconds and then used the start times of  
195 each video to convert it to real time (Supplementary Table S2). To convert ant location data from pixels  
196 to centimeters, we placed a ruler in each video to determine the conversion factor (Supplementary Fig. 2).

197 To determine how individual ants were moving, we calculated the following variables: average  
198 speed, overall direction, time on the trail, and straightness. Average speed was taken as the total distance  
199 an ant travels while in the video over the time it takes for them to travel that distance. Overall direction  
200 was whether the ant headed away from or towards the nest which we determined based on where the ant  
201 entered and exited the video view. A variety of measures are used to determine the straightness or  
202 tortuosity of an animal's movement path<sup>28,29</sup>. Ant movement on trunk trails is expected to move in an  
203 oriented direction, and not be a random search path, thus we used the simplest measure, the straightness  
204 index<sup>29</sup>. The straightness index (ST) is a ratio between the net displacement and total path length:

$$205 \quad \text{ST} = d/L;$$

206 where d = the distance between the beginning and end of the path and L = total  
207 path length.

208



209 *Agent-based model*

210 To assess the influence of foraging style on disease risk, we developed an agent-based model in NetLogo  
211 6.0.2<sup>30</sup> based on the walking style of the ants in our videos (full details in Supplementary Materials). This  
212 model tested how walking straight influences the hypothetical number of spores an ant picks up. Spore  
213 density varied from 10% to 100% of the patches in the environment covered in spores. We varied spore  
214 density in 10% increments, leading to 10 different spore density conditions. The straightness of an ant  
215 varied from 0 to 1 in 0.01 increments, leading to 101 different straightness scores. The model was run 30  
216 times for each combination of parameters (1010 total combinations) leading to a total of 30300 runs.

217

218 *Statistical analysis*

219 A linear mixed-effects models fit was used to assess whether the speed of ant changes over a foraging  
220 period. The model was generated using the lmer function in the R package 'lme4'<sup>31</sup>, with speed as the  
221 fixed effect and colony and date as the random effects. The package 'lmerTest'<sup>32</sup> was used to generate p-  
222 values. We checked the plotted residuals to ensure homoscedasticity prior to utilizing the results of the  
223 model. We used linear regression to analyze the results of the agent-based model, with the straightness  
224 value as the predictor of proportion of spores picked up in the environment with a log transformation to  
225 control for skew.

226

227 *Data Availability*

228 The original videos and data analyzed in this study will be accessible through ScholarSphere  
229 (<https://scholarsphere.psu.edu/>) upon publication of this study.

230

231

232

233

234

## 235 **Results**

### 236 *Automated tracking performance*

237 The automated tracking of ants in video frames resulted in 20,230,585 data points on ant movement. The  
238 model had two types of accuracy against which it can be judged, relative to a human. The first is species  
239 accuracy (detection accuracy) which is a measure of how well the model recognized the correct species of  
240 ant. The model correctly detected *C. rufipes* ants with an accuracy of 97.86%. The model picked up other  
241 insects or species of ants on the trail (false positive) or failed to detect a *C. rufipes* ant as it went across  
242 the trail 2.14% of the time.

243 The second accuracy measurement is tracking accuracy. The computer had to detect *C. rufipes*  
244 ants and follow them as they moved across the screen. If an ant moved in a straight line this required the  
245 computer to recognize and track that ant for about 4 seconds or 120 frames. The computer assigned  
246 identification numbers to individual ants to follow an ant as it travelled across the screen. The machine  
247 learning model sometimes made errors in doing this. The computer may switch identification numbers  
248 when ants walked too closely together (Supplementary Video S2). The average tracking accuracy for all  
249 colonies was 78.70%. The tracking accuracy was the lowest for MP2 (40.0%), MP11 (31.7%), and MP17  
250 (50.6%). Identification number switches commonly happened in colonies MP2 and MP11. These trails  
251 were very thin and introduced more challenges in determining the trajectories of individual ants, so they  
252 were removed from further analysis. We have additionally removed MP17 as an obstruction in the trail  
253 led to ants departing from the branch and walking underneath leaves (Supplementary Video S3). Ants  
254 disappearing under leaf debris made it difficult to track an individual ant. We have made all videos and  
255 data available as we expect improved future machine learning models can make use of them.

256 The exclusion of these colonies brought the size of the dataset to 8,505,784 data points on ant  
257 movement from four colonies: MP1, MP6, MP10, and MP16. The large reduction of the number of data  
258 points from the elimination of 3 colonies can be attributed to the errors in these branches, where the  
259 density of individuals in congested areas lead to a false inflation of the number of ants and overall data  
260 points. The data points from the 4 included colonies represents the movement data for 64,499 ants. The

261 average tracking accuracy of the remaining colonies was 81.39% (MP1: 72.0%; MP6: 82.1%; MP10:  
262 77.2%; MP16: 92.1%). Most errors were due to an identification number switching to a different ant  
263 (8.28%). The high error rate for MP1 could be attributed to the darkness of the videos causing the model  
264 to miss part of an ant's trajectory or failing to detect an ant in the dark areas of the trail. If we consider  
265 only the errors where a number is on a wrong ant or a number is not on an ant, the accuracy improves  
266 greatly (overall: 90.94%; MP1: 91.5%; MP6: 88.8%; MP10: 86.6%; MP16: 96.3%). We are mainly  
267 concerned with the direction and shape of trajectories, and the main error that impacts an individual ant's  
268 trajectory is when ants switch to the wrong identification number, so the second calculation of accuracy  
269 rate is more reflective of this.

270

### 271 *Collective movement pattern*

272 Most ants walk on the same area of the available trail space (Fig. 1). Ants often follow each other,  
273 walking across the same area (Supplementary Video S4). The trail usage pattern is consistent between  
274 nights (Fig. 1c). The mean speed of all ants from all colonies and nights was 5.19 cm/s  $\pm$  1.61 (standard  
275 deviation). The average speed of the colonies ranged from 4.74 cm/s to 5.62 cm/s and within colony  
276 variability in speed was similar between colonies (mean (cm/s)  $\pm$  standard deviation; MP1: 4.99 $\pm$ 1.69;  
277 MP6: 5.62 $\pm$ 1.60; MP10: 4.88 $\pm$ 1.53; MP16: 4.74 $\pm$ 1.41). The results of the linear mixed effects model  
278 showed that ant speed decreases by 0.50 cm/s  $\pm$  0.07 (standard error) throughout the night ( $t_{(96,45)} = -7.12$ ,  
279  $p < 0.0001$ ) (Supplementary Fig. S3).

280

### 281 *Individual movement pattern*

282 Although most ants walked on the same area of the branch (Fig. 1b-c), there was a subset of ants that  
283 walked differently based on the straightness score (Fig. 2). Based on the behavioral analysis of videos,  
284 ants that had a straightness score of close to one walked straight across the trail as was expected (Fig. 2b;  
285 Supplementary Video S5). We found that 80.8% of ants had a straightness score from 0.75 to 1 ( $n =$

286 50,813). We labelled these ants as ‘direct walkers’. Ants with an intermediate straightness score typically  
287 made it from one end of the trail to the other, but spent time wandering and covering more area of the trail  
288 (Fig. 2b; Supplementary Video S5). We labelled these ants as ‘wanderers’. They represent 13.0% of ants  
289 and had a straightness score from 0.25 to 0.75 ( $n = 8,194$ ). By contrast, 6.2% of ants had a straightness  
290 score of less than 0.25 ( $n=3,869$ ). These ants with a very low straightness score typically circled on the  
291 trail consequently entering and exiting on the same side of the video view (Fig. 2c; Supplementary Video  
292 S5). We labelled these ants as ‘circlers’.

293 The wanderers and circlers constituted the minority of records (13% and 6.2% respectively). We  
294 observed these two behavioral phenotypes regardless of whether there were other ants in the area  
295 (Supplementary Video S5). These ants often stopped and groomed or antennated the trail or air  
296 (Supplementary Video S6). However, direct walkers were also observed stopping and grooming their  
297 antennae (Supplementary Video S7). There was a significant effect of straightness group on time spent on  
298 the trail for all three groups (Fig. 3e; one-way ANOVA;  $F_{(2, 64495)} = 14350$ ,  $p < 0.0001$ ). Post hoc  
299 comparisons using the Tukey Test indicates circlers did not spend more time on the trail (mean=8.1  
300 seconds,  $SD=6.85$ ) than wanderers (mean=7.58 seconds,  $SD=3.59$ ), but both spent significantly more  
301 time on the trail than direct walkers (mean=3.88 seconds,  $SD=1.42$ ).

302

### 303 *Temporal movement pattern*

304 The flow of all three groups of ants (direct walkers/wanderers/circlers) in and out of the nest was  
305 approximately the same throughout the night (Fig. 3). There is a large increase in the number of direct  
306 walkers on the trail throughout the night, while the number of wanderers and circlers throughout the night  
307 is relatively constant.

308

### 309 *Agent-based model*

310 Based on the results obtained from our agent based model, walking straight significantly decreases the  
311 proportion of potential spores an ant picks up in an environment (linear regression:  $F_{(1, 30298)} = 5,458$ ,  $p <$

312 0.0001; Fig. 4a). The three different groups of foragers differed in the number of spores they pick up in  
313 the environment regardless of spore density ( $F_{(2, 30297)}=21,208$ ,  $p < 0.0001$ ; Fig. 4b). Circlers pick up  
314 significantly more spores than wanderers and wanderers may pick up significantly more spores than direct  
315 walkers (Tukey Test;  $p < 0.0001$ ).

316

## 317 **Discussion**

318 Our study utilized an unobtrusive filming set-up to record behavioral data on more than 64,000 ants  
319 moving in a rainforest at night in an area of high disease pressure. The study design facilitated the capture  
320 of natural ant behavior unaffected by either a laboratory environment or proximity to human observers.  
321 Combining this approach with computer vision techniques increases the scale at which we can study  
322 animal behavior. Using computer vision and deep learning we collected approximately 20 million ant  
323 movement data points from 80 hours of nighttime video. A previous study, using humans to score the  
324 positions of ants in each frame, required approximately 1,600 hours of human work to create a dataset of  
325 6.9 million data points (Modlmeier et al., in review). Advances in camera technology improving our  
326 nighttime recording capabilities along with increased computing power allowing machine learning to  
327 identify individuals promotes research on natural animal behavior.

328         For our study on ant behavior in the context of disease transmission, the scale of this data  
329 detected higher level patterns likely unobservable with a less detailed dataset. Our data shows ants  
330 flowing in and out of the nest at approximately the same rate (Fig. 3). Work on harvester ants  
331 (*Pogonomyrmex barbatus*) has shown that the feedback from returning foragers stimulates inactive  
332 foragers to leave on a new trip<sup>33</sup>. Our even flow rate also validates work on Argentine ants (*Linepithma*  
333 *humile*) showing ants exiting and entering the nest at approximately the same rate in the summer<sup>34</sup>. Ant  
334 colonies operate through local interactions and without centralized control, so there is no authority  
335 controlling when ants leave and return to the nest<sup>35,36</sup>. The lack of centralized control combined with the  
336 even flow rate gives insight into the processes occurring within a nest, with returning foragers likely  
337 stimulating new foragers to leave the nest.

338           Given that there is no centralized plan for foraging, it is impressive that the same foraging pattern  
339 arises on different days (Fig. 1c). This consistent trail usage pattern, along with most ants walking straight  
340 across the trail (Fig. 2a) likely emerges from the use of a chemical trail, which this species of ant (*C.*  
341 *rufipes*) is known to use<sup>37</sup>. For ants to walk on the same area of the trail on different nights, the trail  
342 pheromone must either persist between foraging periods or foragers repeatedly reinforce the fastest route  
343 across the branch each night. While rare, we observed some ants on these trails during the daytime, and  
344 other studies have observed *C. rufipes* foraging during the day<sup>20</sup>. This could allow the trail to be  
345 reinforced around the clock. Alternatively, laboratory studies have demonstrated ants as preferentially  
346 selecting the shortest route to food<sup>38,39</sup>. The path that receives more pheromone will be reinforced  
347 quicker<sup>40</sup>. Thus, each night the portion of the trail that ants walk on fastest could reach a higher  
348 concentration of trail pheromone quicker, leading to the pattern observed.

349           The texture of the tree branch could also drive the space usage pattern, as substrate and landscape  
350 features impact ant locomotion<sup>41,42</sup>. Loreto et al. (2013) demonstrated, in the same population we studied,  
351 that *C. rufipes* foragers in this environment prefer to walk on woody debris because they walk faster on  
352 this material than on the forest floor (see Supplementary Video S8 for an example of how ants are  
353 impeded on the forest floor). The type of wood could also make a difference, with ants preferring to walk  
354 on areas of the trail that are least restrictive to their movement. Another pattern emerged through  
355 investigation of the straightness index of the ants. As expected, the straightness index of most ants was  
356 close to one (80.8%; n=50,813), indicating that they walked directly across the trail (Fig. 2). Ants may  
357 prefer on the path that deviates the least from their original direction of travel<sup>43</sup>. Straighter individual  
358 paths enhance information spread and increase the chance that an ant will find food<sup>44,45</sup>, perhaps making  
359 this pattern beneficial to the collective colony in resource acquisition.

360           Despite the dominance of ants walking straight across the trail, a proportion of foragers wandered  
361 before making it across the trail and another group circled the trail and headed back in their original  
362 direction (Supplementary Video S5). Other species of ants provide evidence of different roles within  
363 foragers, such as patrolling, trail maintenance, and defense. Patrollers in harvester ants are the first to

364 leave the nest in a foraging period and determine which trails the colony will use that day<sup>46</sup>. However, if  
365 the subtypes in this study were patrollers, we would expect there to be more of them at the beginning of  
366 the night which is not the case (Fig. 3). The leaf cutting ant *Atta cephalotes*, which also forms consistent  
367 trails, has a special class of foragers involved in trail maintenance<sup>13,47</sup>. Ants were observed carrying leaves  
368 (Supplementary Video S9), although this could be for nest material and not trail cleaning. Another role  
369 could be maintaining the pheromone trail. For example, *Atta sexdens* minors help with the pheromone  
370 trail instead of food transport<sup>47</sup>. Ants were observed dragging their gaster on the trail likely depositing  
371 trail pheromone (Supplementary Video S10). However, it seems unlikely wanderers and circlers were  
372 involved in maintaining the pheromone trail, as they should walk straight across the trail to ensure the  
373 pheromone trail was on the most direct path.

374 The subtypes could also be involved in defense. Wanderers and circlers spent more time on the  
375 trail (Fig. 2c) and were observed stopping and antennating (Supplementary Video S8). Smaller workers  
376 hitchhike on leaf fragments carried by larger workers in *Atta colombica* leaf-cutting ants, and this likely  
377 serves as a defense against parasitoid Phorid flies<sup>48</sup>. Flies, that could possibly be parasitoids, were  
378 observed closely following ants on the trail and in some cases appearing to land which may indicate  
379 laying eggs on the ants which later become endoparasitoids (Supplementary Video S11) although the  
380 prevalence of parasitoid flies attacking *C. rufipes* is unknown. We have observed adult ants infected by  
381 decapitating phorid flies in our study area (Supplementary Video S12).

382 Conversely, the forager variation in walking straight may not indicate different roles within the  
383 colony and instead demonstrate differences in response plasticity, as individuals may differ in their  
384 detection of the pheromone trail. Bumblebees (*Bombus terrestris*) vary in their antennal sensitivity to  
385 odors and different behavioral thresholds have been found for castes of the ant *Pheidole pallidula*<sup>49,50</sup>.  
386 Heterogeneity can be beneficial to the collective colony in tasks such as selecting a new nest<sup>51</sup>. In the  
387 context of trunk trail foraging, it could encourage exploration and increase the chance of discovery of  
388 high value food items. *Camponotus rufipes* typically uses trunk trails to exploit dependable food  
389 resources such as hemipteran secretions or extrafloral secretions. If the colony always remains on the

390 trunk trails, they might deplete their dependable source of food and not have a suitable alternative.  
391 Argentine ants are able to adapt trails in response to resource availability<sup>52</sup>. We suggest wandering and  
392 circling as a mechanism for *C. rufipes* ants to similarly respond to changes in resource availability. We  
393 filmed only a small area of the foraging trails, providing a brief snapshot of an ant's behavior. To know  
394 whether wanderers or circlers are more likely to wander from the trail and discover new food resources,  
395 one would need to follow individual ants during an entire foraging trip, which was beyond the scope of  
396 this study.

397         Following individual ants for their entire foraging trip would also clarify whether the straightness  
398 groups represent fixed behavioral groups or if they just demonstrate variation in individual behavior over  
399 time. Campos et al. (2016) studied the activity patterns of *Aphaenogaster sensilis* ants and found foraging  
400 trajectories to be descriptively similar with individual temporal activity patterns showing greater  
401 variation. In the context of our study, perhaps all ants engage in wandering or circling behavior on these  
402 trails, and it is related to their temporal activity pattern and not their behavioral role.

403         Regardless of whether these are fixed subtypes within the colony, variability in walking behavior  
404 could impact the maintenance of disease in this environment. Fungal infected cadavers surround these  
405 trunk trails, likely dropping spores directly onto the trails below<sup>17</sup>. It is not possible to quantify the  
406 abundance and distribution of micron sized spores on trails in a forest, but the long term tracking of  
407 cadaver abundance and the proximity to the trails implies spore presence on the foraging trails<sup>17</sup>.  
408 According to our simulations, walking in a straight line reduces a forager's risk of picking up spores (Fig.  
409 4). If all ants walked in exactly the same straight line, this could prevent the disease cycle from  
410 continuing, especially since the first ants would initially clear all of the spores off. Yet, this does not  
411 occur as the circlers and wanderers deviate from the straight path increasing their probability of picking  
412 up spores and maintaining a chronic infection of the colony.

413         If the risk of infection is larger for the circlers and wanderers (Fig. 4), why do these subgroups  
414 still exist? Social insects have members of the colony known as scouts that assist in discovering and  
415 recruiting the colony to new food sources<sup>54-57</sup>. The wandering and circling behavior observed in this study



416 could reflect the individual ant's role in food discovery, instead of food retrieval. Colonies with this  
417 variability in forager behavior are perhaps better able to obtain resources, improving their reproductive  
418 success and maintaining the diversity in forager behavior. Simultaneously, it allows persistence of the  
419 fungal parasite in the system, but the loss these ants is likely not enough to have a selective impact on the  
420 colony, as it is only a small percentage of foragers as suggested by Loreto et al. (2014). In the harvester  
421 ant *Pogonomyrmex owyheei*, less than 10% of the colony foraged and it was usually less than 6% at one  
422 time<sup>58</sup>. Reproductive success was also hardly impacted when harvester ant foragers were restricted from  
423 foraging<sup>59</sup> implying colonies usually gather more than enough food and fitness would likely not take a  
424 huge hit from the loss of a few foragers. Scharf et al (2017) additionally demonstrated that colony fitness  
425 (as measured through the number of reproductive individuals produced) remained unchanged from  
426 parasitic infection. In our system, relatively few foragers appear to be infected and killed by the parasite<sup>17</sup>.  
427 In addition, the density of spores in the trails could be very low, since the trail network occupies less than  
428 2% of the nest surrounding area<sup>15</sup>. Understanding the direct relationship between ant cadavers (from  
429 where spores are shot) and the trails (where new hosts are found) would improve our agent-based model  
430 predictions and help to understand the importance of wanderers and circlers for colony disease risk  
431 management.

432         Although these behavioral subtypes are only a small proportion of the colony, that small  
433 proportion could be more than enough ants to sustain a parasitic fungus. Understanding how variation in  
434 behavior influences pathogen risk provides information on the factors that shape the distribution of  
435 animals in time and space. Computational techniques serve as a way to collect large datasets on animal  
436 behavior, where one can begin to unearth the complex interactions between an animal and its habitat.

437

438

439

440 **Figures**

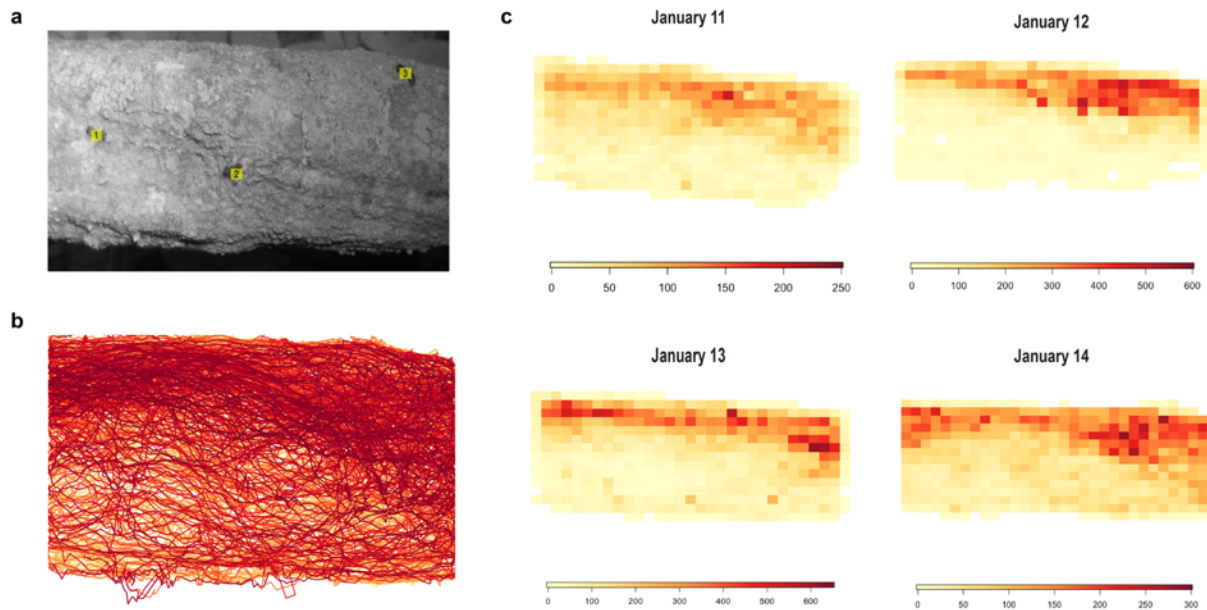

441

442 **Figure 1. Trail image, trajectory overlay, and collective movement pattern. (a)** Example image of a

443 trail filmed taken from GoPro footage from colony MP1. Ants are labeled with identification numbers.

444 **(b)** All of the trajectories from a single night of footage (January 14) at colony MP1. Each line across the

445 trail represents a different ant, with the different colors distinguishing between different ant tracks. **(c)**

446 The trail space from (a) was divided into a grid with each square representing approximately 1 cm<sup>2</sup>. The

447 number of times an ant walks into a square of the grid was calculated and the darker colors represent

448 areas of the trail that ants walked over more. Each heatmap represents a different date (January 11

449 through January 14) from approximately the middle of the night to control for differences in the timing of

450 filming. Different scales were used for each night, due to variance in the number of ants that walked

451 across the trail.

452

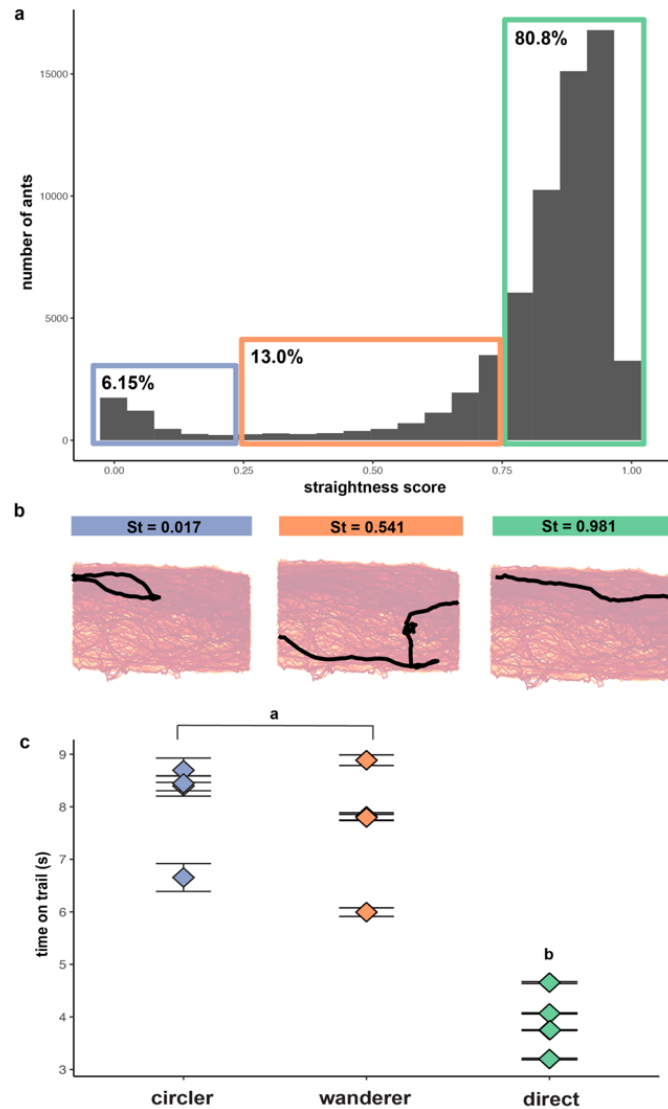

453

454

455 **Figure 2. Different behavioral groups based on straightness score. (a)** Histogram showing the  
456 distribution of straightness scores for all nights and colonies. **(b)** Example trajectories for a circler,  
457 wanderer and direct walker highlighted over all of the trajectories shown in Figure 1b. The straightness  
458 score (St) for that trajectory is included above. **(c)** Mean time spent moving across the trail in seconds for  
459 each different behavioral group and colony  $\pm$  standard error of the mean. Different points within a  
460 behavioral group represent different colonies. Superscripts indicate groups as significantly different ( $p <$   
461 0.0001).

462

463

464

465

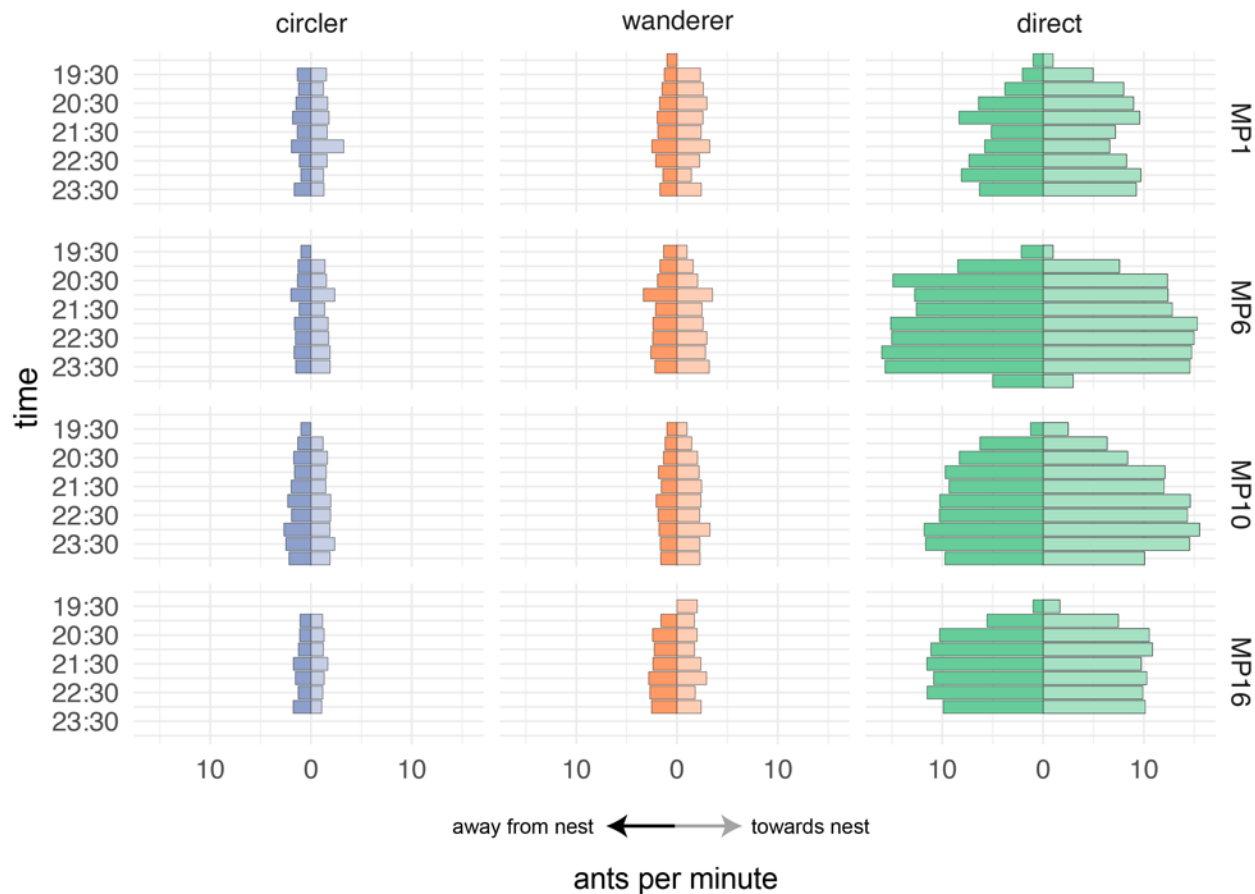

466

467 **Figure 3. Distribution of different behavioral groups over time.** Mean number of ants per minute in

468 each behavioral group in a 30-minute period going either away from the nest or towards to the nest.

469 Averaged across all nights for each colony. Right side numbers represent different colonies.

470

471

472

473

474

475  
476  
477  
478  
479  
480

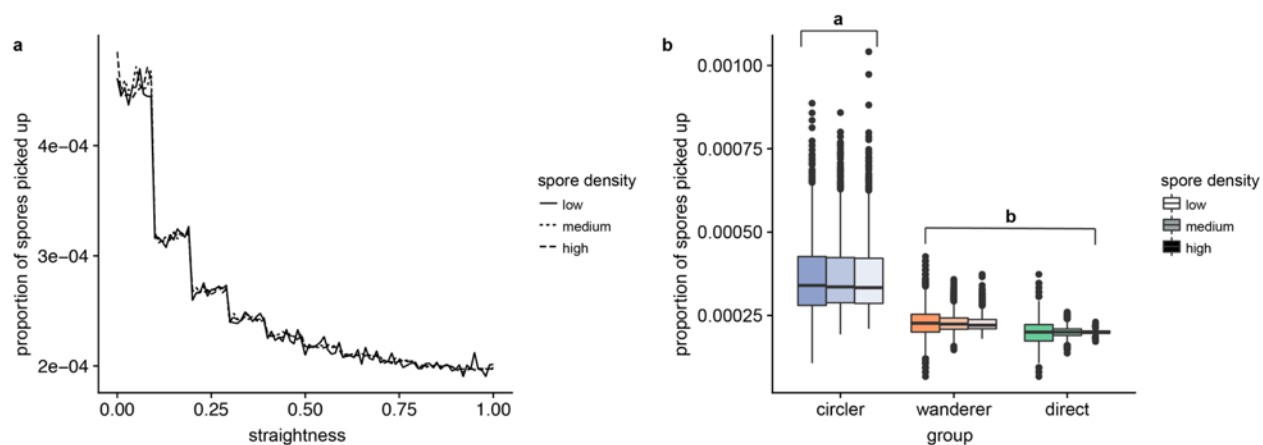

481  
482 **Figure 4. Risk of spore exposure for different behavioral groups. (a)** Mean proportion of  
483 spores picked up as simulated ants in the agent-based model walk across the trail with different  
484 straightness scores **(b)** Data from (a), with straightness divided into behavioral groups.  
485 Superscripts indicate groups as significantly different ( $p < 0.001$ ).

486  
487  
488  
489  
490  
491  
492  
493

494 **References**

- 495 1. Moore, J. *Parasites and the behavior of animals*. (Oxford Univ. Press, 2002).
- 496 2. Fouks, B. & Lattorff, H. M. G. Recognition and Avoidance of Contaminated Flowers by Foraging  
497 Bumblebees (*Bombus terrestris*). *PLOS ONE* **6**, e26328 (2011).
- 498 3. Weinstein, S. B., Moura, C. W., Mendez, J. F. & Lafferty, K. D. Fear of feces? Tradeoffs between  
499 disease risk and foraging drive animal activity around raccoon latrines. *Oikos* n/a-n/a (2018).  
500 doi:10.1111/oik.04866
- 501 4. Villani, M. G. *et al.* Use of Radiography and Tunnel Castings for Observing Mole Cricket  
502 (Orthoptera: Gryllotalpidae) Behavior in Soil. *Am. Entomol.* **48**, 42–50 (2002).
- 503 5. Wynne, R., Morris, A. & Rae, R. Behavioural avoidance by slugs and snails of the parasitic nematode  
504 *Phasmarhabditis hermaphrodita*. *Biocontrol Sci. Technol.* **26**, 1129–1138 (2016).
- 505 6. Boomsma, J., Schmid-Hempel, P. & Hughes, W. Life histories and parasite pressure across the major  
506 groups of social insects. in *Insect evolutionary ecology: proceedings of the Royal Entomological*  
507 *Society's 22nd Symposium* 139–175 (CABI Publishing, 2005).
- 508 7. Hölldobler, B. & Wilson, E. O. *The ants*. (Springer Verlag, 1990).
- 509 8. Edelstein-Keshet, L., Watmough, J. & Ermentrout, G. B. Trail following in ants: individual properties  
510 determine population behaviour. *Behav. Ecol. Sociobiol.* **36**, 119–133 (1995).
- 511 9. Couzin, I. D. & Franks, N. R. Self-organized lane formation and optimized traffic flow in army ants.  
512 *Proc. R. Soc. Lond. B Biol. Sci.* **270**, 139–146 (2003).
- 513 10. Fourcassié, V., Dussutour, A. & Deneubourg, J.-L. Ant traffic rules. *J. Exp. Biol.* **213**, 2357–2363  
514 (2010).
- 515 11. Edelstein-Keshet, L. Simple models for trail-following behaviour; Trunk trails versus individual  
516 foragers. *J. Math. Biol.* **32**, 303–328 (1994).
- 517 12. Kost, C., Oliveira, E. G. de, Knoch, T. A. & Wirth, R. Spatio-temporal permanence and plasticity of  
518 foraging trails in young and mature leaf-cutting ant colonies (*Atta* spp.). *J. Trop. Ecol.* **21**, 677–688  
519 (2005).

- 520 13. Howard, J. J. Costs of trail construction and maintenance in the leaf-cutting ant *Atta columbica*.  
521 *Behav. Ecol. Sociobiol.* **49**, 348–356 (2001).
- 522 14. Jaffe, K. & Sanchez, C. On the nestmate-recognition system and territorial marking behaviour in the  
523 ant *Camponotus rufipes*. *Insectes Sociaux* **31**, 302–315 (1984).
- 524 15. Loreto, R. G. *et al.* Foraging ants trade off further for faster: use of natural bridges and trunk trail  
525 permanency in carpenter ants. *Naturwissenschaften* **100**, 957–963 (2013).
- 526 16. Evans, H. C., Elliot, S. L. & Hughes, D. P. Hidden Diversity Behind the Zombie-Ant Fungus  
527 *Ophiocordyceps unilateralis*: Four New Species Described from Carpenter Ants in Minas Gerais,  
528 Brazil. *PLOS ONE* **6**, e17024 (2011).
- 529 17. Loreto, R. G., Elliot, S. L., Freitas, M. L. R., Pereira, T. M. & Hughes, D. P. Long-Term Disease  
530 Dynamics for a Specialized Parasite of Ant Societies: A Field Study. *PLOS ONE* **9**, e103516 (2014).
- 531 18. Evans, H. C. & Samson, R. A. Cordyceps species and their anamorphs pathogenic on ants  
532 (Formicidae) in tropical forest ecosystems II. The *Camponotus* (Formicinae) complex. *Trans. Br.*  
533 *Mycol. Soc.* **82**, 127–150 (1984).
- 534 19. Araújo, J. & Hughes, D. *The fungal spore: myrmecophilous Ophiocordyceps as a case study*. (CRC  
535 Press, USA, 2017).
- 536 20. Del-Claro, K. & Oliveira, P. S. Ant-Homoptera Interactions in a Neotropical Savanna: The  
537 Honeydew-Producing Treehopper, *Guayaquila xiphias* (Membracidae), and its Associated Ant Fauna  
538 on *Didymopanax vinosum* (Araliaceae) 1. *Biotropica* **31**, 135–144 (1999).
- 539 21. Burd, M., Archer, D., Aranwela, N. & Stradling, D. J. Traffic Dynamics of the Leaf-Cutting Ant,  
540 *Atta cephalotes*. *Am. Nat.* **159**, 283–293 (2002).
- 541 22. Yang, L., Zhang, Y., Chen, J., Zhang, S. & Chen, D. Z. Suggestive Annotation: A Deep Active  
542 Learning Framework for Biomedical Image Segmentation. in *Medical Image Computing and*  
543 *Computer-Assisted Intervention – MICCAI 2017* 399–407 (Springer, Cham, 2017). doi:10.1007/978-  
544 3-319-66179-7\_46

- 545 23. He, K., Gkioxari, G., Dollár, P. & Girshick, R. Mask R-CNN. in *2017 IEEE International*  
546 *Conference on Computer Vision (ICCV)* 2980–2988 (2017). doi:10.1109/ICCV.2017.322
- 547 24. Chen, J., Harvey, C. W., Alber, M. S. & Chen, D. Z. A Matching Model Based on Earth Mover’s  
548 Distance for Tracking Myxococcus Xanthus. in *Medical Image Computing and Computer-Assisted*  
549 *Intervention – MICCAI 2014* 113–120 (Springer, Cham, 2014). doi:10.1007/978-3-319-10470-6\_15
- 550 25. Chen, J., Alber, M. S. & Chen, D. Z. A Hybrid Approach for Segmentation and Tracking of  
551 Myxococcus Xanthus Swarms. *IEEE Trans. Med. Imaging* **35**, 2074–2084 (2016).
- 552 26. R Core Team. *R: A Language and Environment for Statistical Computing*. (R Foundation for  
553 Statistical Computing, 2018).
- 554 27. RStudio Team. *RStudio: Integrated Development Environment for R*. (RStudio, Inc., 2016).
- 555 28. Benhamou, S. How to reliably estimate the tortuosity of an animal’s path:: straightness, sinuosity, or  
556 fractal dimension? *J. Theor. Biol.* **229**, 209–220 (2004).
- 557 29. Almeida, P. J. A. L., Vieira, M. V., Kajin, M., Forero-Medina, G. & Cerqueira, R. Indices of  
558 movement behaviour: conceptual background, effects of scale and location errors. *Zoologia* **27**,  
559 (2010).
- 560 30. Wilensky, U. *NetLogo*. (Center for Connected Learning and Computer-Based Modeling, 1999).
- 561 31. Bates, D., Mächler, M., Bolker, B. & Walker, S. Fitting Linear Mixed-Effects Models Using lme4. *J.*  
562 *Stat. Softw.* **67**, 1–48 (2015).
- 563 32. Kuznetsova, A., Brockhoff, P. B. & Christensen, R. H. B. lmerTest Package: Tests in Linear Mixed  
564 Effects Models. *J. Stat. Softw.* **82**, (2017).
- 565 33. Greene, M. J. & Gordon, D. M. Social insects: Cuticular hydrocarbons inform task decisions. *Nature*  
566 **423**, 32 (2003).
- 567 34. Heller, N. E. & Gordon, D. M. Seasonal spatial dynamics and causes of nest movement in colonies of  
568 the invasive Argentine ant (*Linepithema humile*). *Ecol. Entomol.* (2006).
- 569 35. Detrain, C. & Deneubourg, J.-L. Self-organized structures in a superorganism: do ants “behave” like  
570 molecules? *Phys. Life Rev.* **3**, 162–187 (2006).



- 571 36. Gordon, D. M. *Ant encounters: interaction networks and colony behavior*. (Princeton University  
572 Press, 2010).
- 573 37. Übler, E., Kern, F., Bestmann, H. J., Hölldobler, B. & Attygalle, A. B. Trail pheromone of two  
574 formicine ants, *Camponotus silvicola* and *C. rufipes* (Hymenoptera: Formicidae).  
575 *Naturwissenschaften* **82**, 523–525 (1995).
- 576 38. Goss, S., Aron, S., Deneubourg, J. L. & Pasteels, J. M. Self-organized shortcuts in the Argentine ant.  
577 *Naturwissenschaften* **76**, 579–581 (1989).
- 578 39. Beckers, R., Deneubourg, J. L. & Goss, S. Trail laying behaviour during food recruitment in the ant  
579 *Lasius niger* (L.). *Insectes Sociaux* **39**, 59–72 (1992).
- 580 40. Vittori, K. *et al.* Path efficiency of ant foraging trails in an artificial network. *J. Theor. Biol.* **239**,  
581 507–515 (2006).
- 582 41. Burd, M., Shiwakoti, N., Sarvi, M. & Rose, G. Nest architecture and traffic flow: large potential  
583 effects from small structural features. *Ecol. Entomol.* **35**, 464–468 (2010).
- 584 42. Bernadou, A. & Fourcassié, V. Does substrate coarseness matter for foraging ants? An experiment  
585 with *Lasius niger* (Hymenoptera; Formicidae). *J. Insect Physiol.* **54**, 534–542 (2008).
- 586 43. Yates, A. A. & Nonacs, P. Preference for straight-line paths in recruitment trail formation of the  
587 Argentine ant, *Linepithema humile*. *Insectes Sociaux* **63**, 501–505 (2016).
- 588 44. Pearce-Duvet, J. M. C., Elemans, C. P. H. & Feener, D. H. Walking the line: search behavior and  
589 foraging success in ant species. *Behav. Ecol.* **22**, 501–509 (2011).
- 590 45. Adler, F. R. & Gordon, D. M. Information Collection and Spread by Networks of Patrolling Ants.  
591 *Am. Nat.* **140**, 373–400 (1992).
- 592 46. Gordon, D. M. Behavioral Flexibility and the Foraging Ecology of Seed-Eating Ants. *Am. Nat.* **138**,  
593 379–411 (1991).
- 594 47. Evison, S. E. F., Hart, A. G. & Jackson, D. E. Minor workers have a major role in the maintenance of  
595 leafcutter ant pheromone trails. *Anim. Behav.* **75**, 963–969 (2008).

- 596 48. Feener, D. H. & Moss, K. A. G. Defense against parasites by hitchhikers in leaf-cutting ants: a  
597 quantitative assessment. *Behav. Ecol. Sociobiol.* **26**, 17–29 (1990).
- 598 49. Spaethe, J., Brockmann, A., Halbig, C. & Tautz, J. Size determines antennal sensitivity and  
599 behavioral threshold to odors in bumblebee workers. *Naturwissenschaften* **94**, 733–739 (2007).
- 600 50. Detrain, C. & Pasteels, J. M. Caste differences in behavioral thresholds as a basis for polyethism  
601 during food recruitment in the ant, *Pheidole pallidula* (Nyl.) (Hymenoptera: Myrmicinae). *J. Insect*  
602 *Behav.* **4**, 157–176 (1991).
- 603 51. Masuda, N., O’shea-Wheller, T. A., Doran, C. & Franks, N. R. Computational model of collective  
604 nest selection by ants with heterogeneous acceptance thresholds. *R. Soc. Open Sci.* **2**, 140533 (2015).
- 605 52. Latty, T., Holmes, M. J., Makinson, J. C. & Beekman, M. Argentine ants (*Linepithema humile*) use  
606 adaptable transportation networks to track changes in resource quality. *J. Exp. Biol.* **220**, 686–694  
607 (2017).
- 608 53. Campos, D., Bartumeus, F., Méndez, V., Andrade, J. S. & Espadaler, X. Variability in individual  
609 activity bursts improves ant foraging success. *J. R. Soc. Interface* **13**, 20160856 (2016).
- 610 54. Von Frisch, K. The dance language and orientation of bees. (1967).
- 611 55. Seeley, T. D. Division of labor between scouts and recruits in honeybee foraging. *Behav. Ecol.*  
612 *Sociobiol.* **12**, 253–259 (1983).
- 613 56. Howard, J. J., Henneman, L. M., Cronin, G., Fox, J. A. & Hormiga, G. Conditioning of scouts and  
614 recruits during foraging by a leaf-cutting ant, *Atta colombica*. *Anim. Behav.* **52**, 299–306 (1996).
- 615 57. Crawford, D. L. & Rissing, S. W. Regulation of recruitment by individual scouts in *Formica oreas*  
616 *Wheeler* (Hymenoptera, Formicidae). *Insectes Sociaux* **30**, 177–183 (1983).
- 617 58. Porter, S. D. & Jorgensen, C. D. Foragers of the harvester ant, *Pogonomyrmex owyheeii*: a disposable  
618 caste? *Behav. Ecol. Sociobiol.* **9**, 247–256 (1981).
- 619 59. Ingram, K. K., Pilko, A., Heer, J. & Gordon, D. M. Colony life history and lifetime reproductive  
620 success of red harvester ant colonies. *J. Anim. Ecol.* **82**, 540–550 (2013).
- 621

622 **Acknowledgements.** We thank the Department of Forest Engineering at the Federal University of Viçosa  
623 for allowing us to perform this study at the Research Station of Mata do Pariso and Dr. Simon Elliot for  
624 hosting us in his laboratory. We are grateful to Charissa de Bekker who helped capture the behavior in  
625 Video S11. This work was supported in part by National Science Foundation Grants IOS-1558062 and  
626 EEID 1414296 to D.P.H, NSF CCF-1617735 to D.Z.C., and NIH Grant R01 GM116927-02 to D.P.H. and  
627 D.Z.C.

628  
629 **Author Contributions Statement.** D.P.H., R.G.L, and N.I. conceived and designed the study. N.I. and  
630 C.K. performed the field work with technical input from R.GL.. Y.Z. and D.Z.C. created the computer  
631 model and processed the data. N.I. analyzed the data and wrote the manuscript with guidance from  
632 D.P.H.. All authors reviewed the manuscript.

633  
634 **Additional Information.** *Competing Interests:* The authors declare no competing interests.

635
